# Supplementary material for: Oligo-Fucoidan prevents IL-6 and CCL2 production and cooperates with p53 to suppress ATM signaling and tumor progression
Source: PubMed Central journal article supplement (PMC5605496; doi:10.1038/s41598-017-12111-1), 2017-09-19

## Supplementary figures

### Oligo-Fucoidan prevents IL-6 and CCL2 production and cooperates with p53 to suppress ATM signaling and tumor progression

Li-Mei Chen<sup>1#</sup>, Po-Yen Liu<sup>1#</sup>, Yen-An Chen<sup>1</sup>, Hong-Yu Tseng<sup>1</sup>, Pei-Chun Shen<sup>1</sup>, Pai-An Hwang<sup>2</sup> and Hsin-Ling Hsu\*

**Supplementary Figure 1. The ATM signaling pathway is more suppressed in the p53<sup>+/+</sup> cells than the p53<sup>-/-</sup> cells after etoposide and Oligo-Fucoidan co-treatment.** The effects of synchronized treatment with Oligo-Fucoidan (200  $\mu$ g/ml) and etoposide (40  $\mu$ M) for different intervals were assayed. The expression levels of different proteins were normalized to those  $\beta$ -actin, whose expression levels in MOCK-treated cells were defined as 1.

## Supplementary Fig. 1

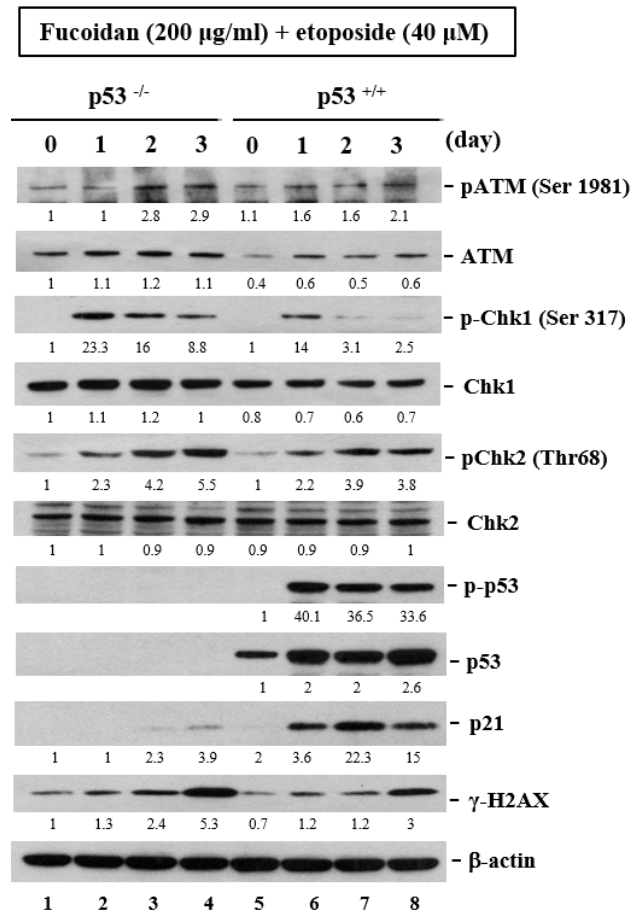

# Oligo-Fucoidan prevents IL-6 and CCL2 production and cooperates with p53 to suppress ATM signaling and tumor progression

Li-Mei Chen<sup>1#</sup>, Po-Yen Liu<sup>1#</sup>, Yen-An Chen<sup>1</sup>, Hong-Yu Tseng<sup>1</sup>, Pei-Chun Shen<sup>1</sup>, Pai-An Hwang<sup>2</sup> and Hsin-Ling Hsu\*

**Supplementary Figure 2. Oligo-Fucoidan (LMF) is more effective to suppress etoposide-induced DNA damage response than the HMF.** (A) Different concentrations of the high molecular weight Fucoidan (HMF) from *Fucus vesiculosus* were examined in management of spontaneous DNA lesions in the HCT116 cells (p53<sup>-/-</sup> and p53<sup>+/+</sup>). (B) The p53<sup>-/-</sup> cells were studied after treatment with etoposide (40 μM), Oligo-Fucoidan (LMF) (400 μg/ml) and the HMF (400 μg/ml) as well as co-treatment of LMF or HMF with etoposide for 48 h. The effects of LMF were compared with the HMF in response to etoposide treatment. (C) The p53<sup>+/+</sup> cells were studied after treatment with etoposide, LMF and the HMF as well as co-treatment of LMF or HMF with etoposide for 48 h. The expression levels of various proteins were normalized to those β-actin, whose expression levels in MOCK-treated cells were defined as 1.

**Supplementary Fig. 2**

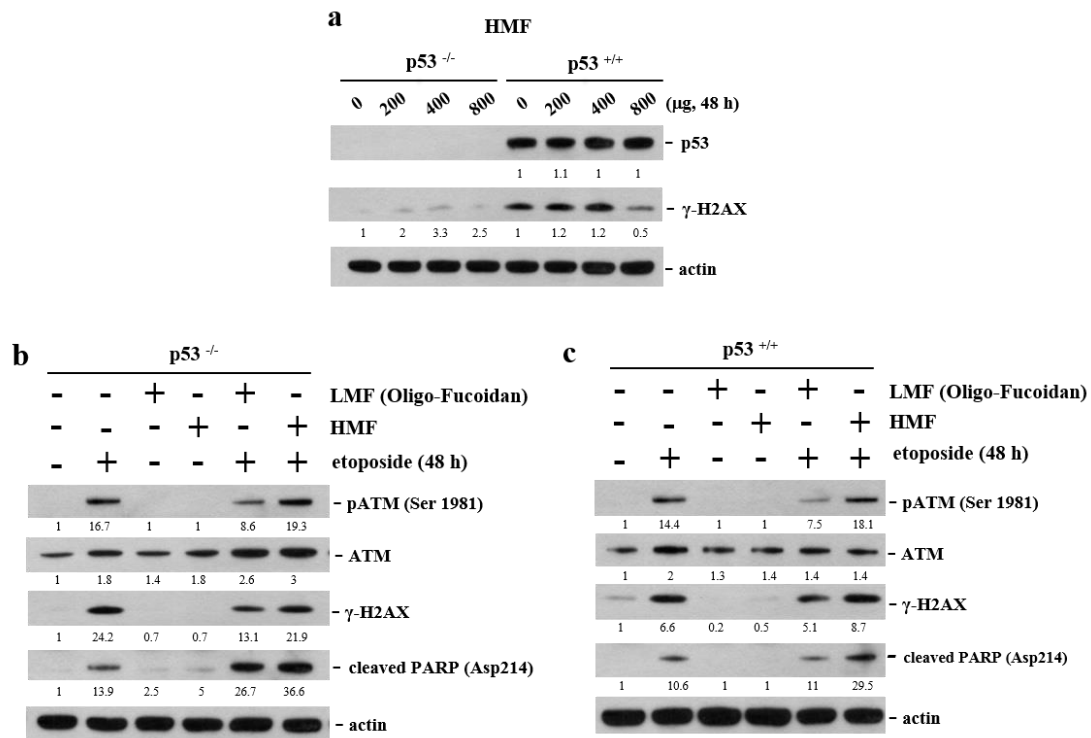

Supplement: 41598_2017_12111_MOESM1_ESM.pdf [file 41598_2017_12111_MOESM1_ESM.pdf]
